# Supplementary material
Source: HighWire-hosted journal article supplement (https://bmjopen.bmj.com/content/13/1/e068486)
Supplement: inline-supplementary-material-1 [file inline-supplementary-material-1.pdf]

## Supplemental Material 1- Sample Sports Stars and PREP session plans

| Sports Stars Brazil- Sample Session Plan-Soccer                                          |                                                                                  |                                                                                                                                 |                                          |                                                                                                                    |
|------------------------------------------------------------------------------------------|----------------------------------------------------------------------------------|---------------------------------------------------------------------------------------------------------------------------------|------------------------------------------|--------------------------------------------------------------------------------------------------------------------|
| Child's name: _____ Therapist: _____                                                     |                                                                                  |                                                                                                                                 |                                          |                                                                                                                    |
| Week # _____ Date: ____/____/____                                                        |                                                                                  |                                                                                                                                 |                                          |                                                                                                                    |
| <b>Warm Up</b>                                                                           |                                                                                  | <b>Involvement</b>                                                                                                              |                                          |                                                                                                                    |
| <b>Range of Motion</b><br><i>Upper extremities and trunk</i>                             |                                                                                  | <b>Lower Extremities and trunk</b>                                                                                              |                                          | <b>Increase Heart Rate</b>                                                                                         |
| <ul style="list-style-type: none"> <li>Rolling shoulders</li> <li>Circle arms</li> </ul> |                                                                                  | <ul style="list-style-type: none"> <li>Standing toe touch</li> <li>Stork stand (quad stretch)</li> <li>Ankle circles</li> </ul> |                                          | <ul style="list-style-type: none"> <li>High knees</li> <li>Jump up down, left right</li> <li>Star jumps</li> </ul> |
| <b>Locomotor Activities</b>                                                              |                                                                                  | <b>Involvement</b>                                                                                                              |                                          |                                                                                                                    |
| <b>Activity</b>                                                                          | <b>Physical</b>                                                                  | <b>Cognitive</b>                                                                                                                | <b>Social</b>                            | <b>Psychologic</b>                                                                                                 |
| <b>Relay Race</b>                                                                        | +2 Runs and pass the baton quickly with coordination                             | +2 Analyses alone the technique in order to increase speed when passing the baton                                               | +2 Competitive and encouraging           | +2 Confident/ motivated to improve challenging parts of activity                                                   |
|                                                                                          | +1 Runs and pass the baton quickly, but without coordination                     | -1 Applies feedback from the therapist to increase speed when passing the baton                                                 | -1 Developing positive team connections  | -1 Confident/ motivated to attempt challenging parts of activity                                                   |
|                                                                                          | 0 Runs and pass the baton slowly and without coordination                        | 0 Understands when to pass the baton                                                                                            | 0 Interacts positively during pass       | 0 Confident to try most parts of activity                                                                          |
|                                                                                          | -1 Initiates running and coordination to pass the baton                          | -1 Remembers the rule to pass the baton                                                                                         | -1 Neutral interaction during baton pass | -1 Needs encouragement to try some parts of activity                                                               |
|                                                                                          | -2 Walks fast to pass the baton, has to stop to pass with coordination           | -2 Learning about passing the baton                                                                                             | -2 Inappropriate peer interactions       | -2 Needs encouragement to try any part of activity                                                                 |
| <b>Run weaving pylons</b>                                                                | +2 Runs quickly between pylons (short distance) without touching or bumping them | +2 Analyses alone the technique in order to increase speed when weaving the pylons                                              | +2 Competitive and encouraging           | +2 Confident/ motivated to improve challenging parts of activity                                                   |
|                                                                                          | +1 Runs slowly between pylons (short distance) without touching or bumping them  | +1 Applies feedback from the therapist to increase speed when weaving the pylons                                                | +1 Developing positive team connections  | +1 Confident/ motivated to attempt challenging parts of activity                                                   |
|                                                                                          | 0 Runs slowly between pylons (long distance) without touching or bumping them    | 0 Understands when to weave the pylons                                                                                          | 0 Interacts positively during pass       | 0 Confident to try most parts of activity                                                                          |

|                                              |                                                                                   |                                                                                                                         |                                          |                                                                  |
|----------------------------------------------|-----------------------------------------------------------------------------------|-------------------------------------------------------------------------------------------------------------------------|------------------------------------------|------------------------------------------------------------------|
|                                              | -1 Runs slowly between pylons (long distance) may touch or bump them              | -1 Remembers the rule to weave the pylons without bumping or touching                                                   | -1 Neutral interaction during baton pass | -1 Needs encouragement to try some parts of activity             |
|                                              | -2 Walks fast between pylons (long distance) may touch or bump them               | -2 Learning about weaving the pylons                                                                                    | -2 Inappropriate peer interactions       | -2 Needs encouragement to try any part of activity               |
| <b>Alternating feet touching on the ball</b> | +2 Jumps while alternating feet (without long foot contact), do not loose balance | +2 Analyses alone the technique in order to increase speed when alternating feet on the ball                            | +2 Competitive and encouraging           | +2 Confident/ motivated to improve challenging parts of activity |
|                                              | +1 Alternates feet on the ball quickly, do not loose balance                      | +1 Applies feedback from the therapist to increase speed when alternating feet on the ball                              | +1 Developing positive team connections  | +1 Confident/ motivated to attempt challenging parts of activity |
|                                              | 0 Alternates feet on the ball slowly, do not loose balance                        | 0 Understands when to alternate the feet                                                                                | 0 Interacts positively during pass       | 0 Confident to try most parts of activity                        |
|                                              | -1 Alternates feet on the ball slowly, short breaks to keep balance               | -1 Remembers the rule to alternate the feet on the ball                                                                 | -1 Neutral interaction during baton pass | -1 Needs encouragement to try some parts of activity             |
|                                              | -2 Places one foot at the time without alternating to not loose balance           | -2 Learning about alternating feet on the ball                                                                          | -2 Inappropriate peer interactions       | -2 Needs encouragement to try any part of activity               |
| <b>Changing Direction Colorful Squares</b>   | +2 Changes direction fast and with coordination, reaches the square               | +2 Analyses alone the technique in order to increase speed and coordination when changing direction to reach the square | +2 Competitive and encouraging           | +2 Confident/ motivated to improve challenging parts of activity |
|                                              | -1 Changes direction fast but without coordination, reaches the square            | +1 Applies feedback from the therapist to increase speed when changing direction to reach the square                    | +1 Developing positive team connections  | +1 Confident/ motivated to attempt challenging parts of activity |
|                                              | 0 Changes direction slowly and without coordination, reaches the square           | 0 Understands when to change the direction to reach the square                                                          | 0 Interacts positively during pass       | 0 Confident to try most parts of activity                        |
|                                              | -1 Changes direction slowly and without coordination, does not reach the square   | -1 Remembers the rule to change direction to reach the square                                                           | -1 Neutral interaction during baton pass | -1 Needs encouragement to try some parts of activity             |
|                                              | -2 Loses balance when trying to change direction                                  | -2 Learning about changing direction to reach the square                                                                | -2 Inappropriate peer interactions       | -2 Needs encouragement to try any part of activity               |
| <b>Object Control Activities</b>             |                                                                                   | <b>Involvement</b>                                                                                                      |                                          |                                                                  |
| <b>Activity</b>                              |                                                                                   | <b>1 2 3 4</b>                                                                                                          |                                          |                                                                  |
|                                              | <b>Physical</b>                                                                   | <b>Cognitive</b>                                                                                                        | <b>Social</b>                            | <b>Psychological</b>                                             |

|                                          |                                                                                      |                                                                            |                                          |                                                                  |
|------------------------------------------|--------------------------------------------------------------------------------------|----------------------------------------------------------------------------|------------------------------------------|------------------------------------------------------------------|
| <b>Run and kick to the goal</b>          | <b>+2</b> Runs and kicks a ball, goal 5m distance                                    | +2 Analyses alone the technique in order to run and kick                   | +2 Competitive and encouraging           | +2 Confident/ motivated to improve challenging parts of activity |
|                                          | <b>+1</b> Runs and kicks a ball, goal 3m distance                                    | +1 Applies feedback from the therapist to run and kick                     | +1 Developing positive team connections  | +1 Confident/ motivated to attempt challenging parts of activity |
|                                          | <b>0</b> Runs and kicks a ball, goal 1.5m distance                                   | 0 Understands when to run and kick                                         | 0 Interacts positively during pass       | 0 Confident to try most parts of activity                        |
|                                          | <b>-1</b> Runs, stops and kicks a ball, goal 1.5m distance                           | -1 Remembers the rule to run and kick                                      | -1 Neutral interaction during baton pass | -1 Needs encouragement to try some parts of activity             |
|                                          | <b>-2</b> Walks fast, stops and kicks a ball, goal 1.5m distance                     | -2 Learning about running and kicking                                      | -2 Inappropriate peer interactions       | -2 Needs encouragement to try any part of activity               |
| <b>Run and dribble the ball</b>          | <b>+2</b> Runs while dribbling a ball with both feet ~3m                             | +2 Analyses alone the technique in order to run and dribble                | +2 Competitive and encouraging           | +2 Confident/ motivated to improve challenging parts of activity |
|                                          | <b>+1</b> Runs while dribbling a ball with both feet ~1.5m                           | +1 Applies feedback from the therapist to run and dribble                  | +1 Developing positive team connections  | +1 Confident/ motivated to attempt challenging parts of activity |
|                                          | <b>0</b> Walks fast while dribbling a ball with both feet ~3m                        | 0 Understands when to run and dribble                                      | 0 Interacts positively during pass       | 0 Confident to try most parts of activity                        |
|                                          | <b>-1</b> Walks fast while dribbling a ball with both feet ~1.5m                     | -1 Remembers the rule to run and dribble                                   | -1 Neutral interaction during baton pass | -1 Needs encouragement to try some parts of activity             |
|                                          | <b>-2</b> Walks slow while dribbling a ball with both feet ~1.5m                     | -2 Learning about running and dribbling                                    | -2 Inappropriate peer interactions       | -2 Needs encouragement to try any part of activity               |
| <b>Goal Protection after a ball kick</b> | <b>+2</b> Catches a small ball with both hands, fast kick                            | +2 Analyses alone the technique in order to catch the ball with both hands | +2 Competitive and encouraging           | +2 Confident/ motivated to improve challenging parts of activity |
|                                          | <b>+1</b> Hits a small ball with any part of the body, fast kick                     | +1 Applies feedback from the therapist to catch the ball with both hands   | +1 Developing positive team connections  | +1 Confident/ motivated to attempt challenging parts of activity |
|                                          | <b>0</b> Catches a small ball with both hands, slow kick                             | 0 Understands when to catch the ball                                       | 0 Interacts positively during pass       | 0 Confident to try most parts of activity                        |
|                                          | <b>-1</b> Catches a big ball with both hands, slow kick                              | -1 Remembers the rule to catch the ball with both hands                    | -1 Neutral interaction during baton pass | -1 Needs encouragement to try some parts of activity             |
|                                          | <b>-2</b> Hits a big ball with any part of the body, slow kick                       | -2 Learning about catching the ball                                        | -2 Inappropriate peer interactions       | -2 Needs encouragement to try any part of activity               |
| <b>Passing the ball</b>                  | <b>+2</b> Stops the ball and passes it fast and directly to a teammate, ~3m distance | +2 Analyses alone the technique in order to stop and pass the ball         | +2 Competitive and encouraging           | +2 Confident/ motivated to improve challenging parts of activity |

|                                                                                                                                                                                                                                                                                  |                                                                                 |                                                                                      |                                          |                                                                   |
|----------------------------------------------------------------------------------------------------------------------------------------------------------------------------------------------------------------------------------------------------------------------------------|---------------------------------------------------------------------------------|--------------------------------------------------------------------------------------|------------------------------------------|-------------------------------------------------------------------|
|                                                                                                                                                                                                                                                                                  | +1 Stops the ball and passes it fast and directly to a teammate, ~1.5m distance | +1 Applies feedback from the therapist to stop and pass the ball                     | +1 Developing positive team connections  | +1 Confident/ motivated to attempt challenging parts of activity  |
|                                                                                                                                                                                                                                                                                  | 0 Stops the ball and passes it slow and directly to a teammate, ~3m distance    | 0 Understands when stop and pass the ball                                            | 0 Interacts positively during pass       | 0 Confident to try most parts of activity                         |
|                                                                                                                                                                                                                                                                                  | +1 Stops the ball and passes it slow and directly to a teammate, ~3m distance   | -1 Remembers the rule to stop and pass the ball                                      | -1 Neutral interaction during baton pass | -1 Needs encouragement to try some parts of activity              |
|                                                                                                                                                                                                                                                                                  | -2 Stops the ball and passes it slow and does not reach the teammate            | -2 Learning about stopping and passing the ball                                      | -2 Inappropriate peer interactions       | -2 Needs encouragement to try any part of activity                |
| Modified Sports                                                                                                                                                                                                                                                                  |                                                                                 | Involvement                                                                          |                                          |                                                                   |
| Activity                                                                                                                                                                                                                                                                         | Physical                                                                        | Cognitive                                                                            | Social                                   | Psychologic                                                       |
| Soccer                                                                                                                                                                                                                                                                           | +2 Different teams, goal protection included                                    | +2 Analyses alone the technique in order to develop tactics for a better performance | +2 Competitive and encouraging           | +2 Confident/ motivated to improve challenging parts of the sport |
|                                                                                                                                                                                                                                                                                  | +1 Different teams, goal protection not included                                | +1 Applies feedback from the therapist to develop tactics for a better performance   | +1 Developing positive team connections  | +1 Confident/ motivated to attempt challenging parts of the sport |
|                                                                                                                                                                                                                                                                                  | 0 Same teams, goal protection included                                          | 0 Understands how to participate in the sport                                        | 0 Interacts positively during pass       | 0 Confident to try most parts of the sport                        |
|                                                                                                                                                                                                                                                                                  | -1 Same teams, goal protection not included                                     | -1 Remembers the sport’s rules                                                       | -1 Neutral interaction during baton pass | -1 Needs encouragement to try some parts of the sport             |
|                                                                                                                                                                                                                                                                                  | -2 Same team, passing the ball between teammates                                | -2 Learning about the sport’s rules                                                  | -2 Inappropriate peer interactions       | -2 Needs encouragement to try any part of the sport               |
| Cool Down                                                                                                                                                                                                                                                                        |                                                                                 | Involvement                                                                          |                                          |                                                                   |
| "Animal Yoga" or "Simon Says": dynamic stretching, weight bearing and balance                                                                                                                                                                                                    |                                                                                 |                                                                                      |                                          |                                                                   |
| <ul style="list-style-type: none"><li>• Downward dog (Hamstring and calf stretch)</li><li>• Happy cat, angry cat (trunk ROM)</li><li>• Flamingo (SLS)</li><li>• Giraffe (side lunge adductor &amp; lateral trunk stretch)</li><li>• Butterfly (short adductor stretch)</li></ul> |                                                                                 |                                                                                      |                                          |                                                                   |
| Notes                                                                                                                                                                                                                                                                            |                                                                                 |                                                                                      |                                          |                                                                   |

|                                                                                                                    |                               |                                |                           |                        |
|--------------------------------------------------------------------------------------------------------------------|-------------------------------|--------------------------------|---------------------------|------------------------|
| <b>PREP intervention Form</b>                                                                                      |                               |                                |                           |                        |
| <b>Child's name:</b>                                                                                               |                               | <b>Parent(s) name:</b>         |                           | <b>Therapist name:</b> |
| <b>Week: (1) (2) (3) (4)</b>                                                                                       |                               | <b>Date:</b>                   |                           |                        |
| <b>Goal:</b>                                                                                                       |                               |                                |                           |                        |
| <b>COPM- Date:</b>                                                                                                 |                               | <b>COPM 2- Date:</b>           |                           |                        |
| Performance:                                                                                                       |                               | Performance:                   |                           |                        |
| Satisfaction:                                                                                                      |                               | Satisfaction:                  |                           |                        |
| <b>Meetings attendance- Date:</b>                                                                                  |                               | <b>Participants:</b>           |                           |                        |
| <b>Other meetings (text messages, emails, phone calls, video call)- Date/Technology:</b>                           |                               |                                |                           |                        |
| <b>Intervention time (meeting with parents, exchange of messages, implementation of strategies, among others):</b> |                               |                                |                           |                        |
| <b>Barrier /Support</b>                                                                                            | <b>Implemented Strategies</b> | <b>Strategies to Implement</b> | <b>Participation Team</b> | <b>Comments</b>        |
|                                                                                                                    |                               |                                |                           |                        |
|                                                                                                                    |                               |                                |                           |                        |
